# Supplementary material
Source: MDPI journal article supplement (https://www.mdpi.com/2410-3888/7/1/52)
Supplement: s1 [file s1]

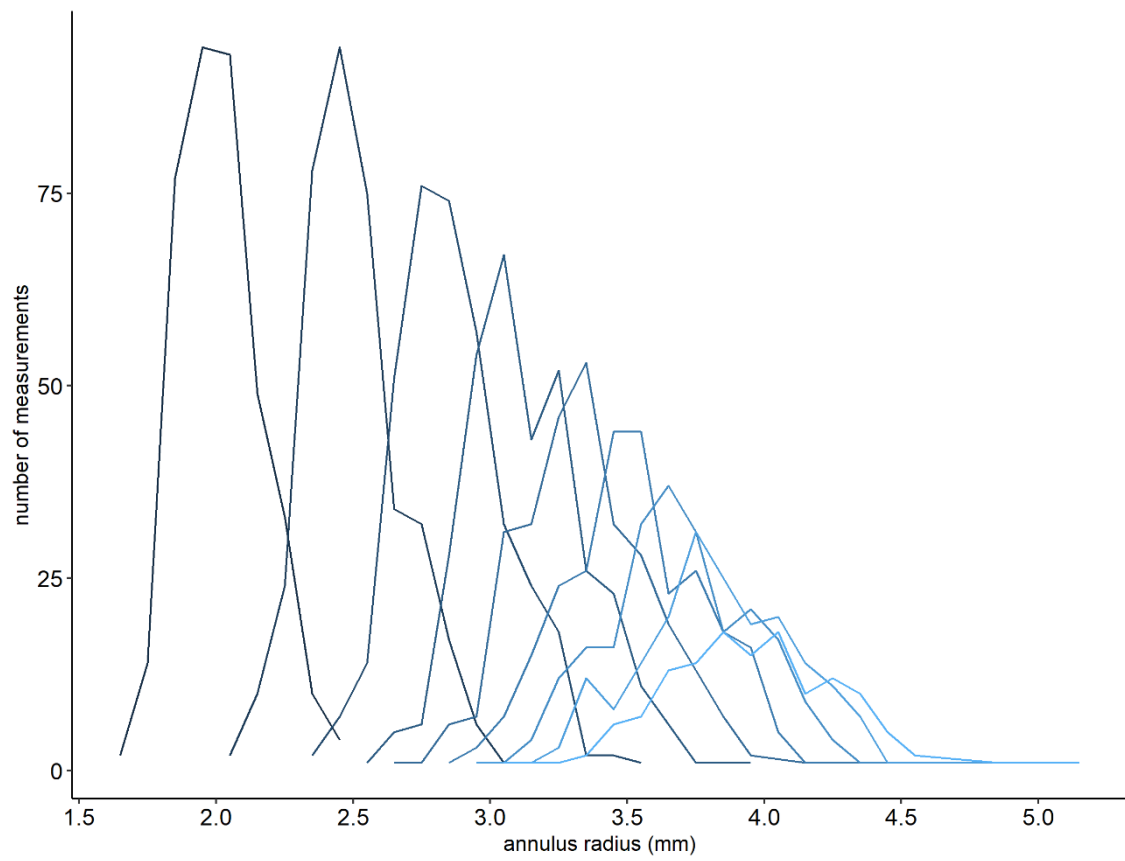

**Supplementary Figure 1.** Frequency distributions of the distances from the nucleus to growth increments at age 1 to 9 assigned in otoliths of *Trachurus picturatus* from Portuguese continental coast.

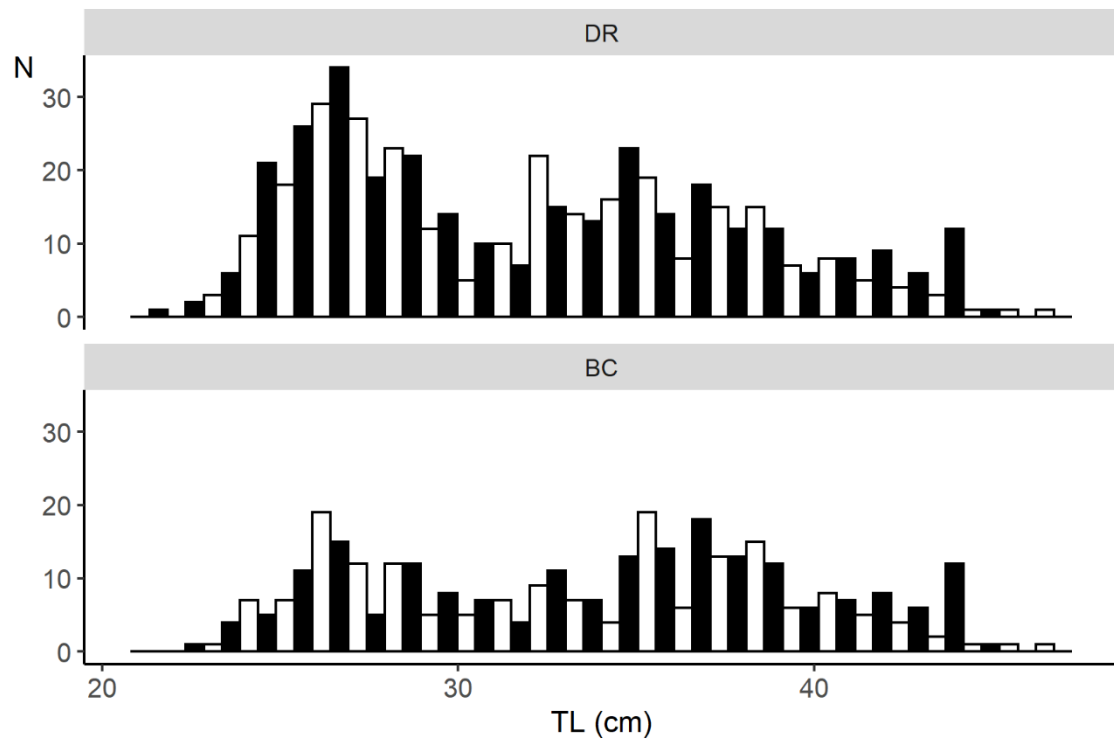

**Supplementary Figure 2.** Length distribution for the two data sets used for *Trachurus picturatus* growth modelling in Portuguese continental coast. DR – direct readings; BC – back-calculation.

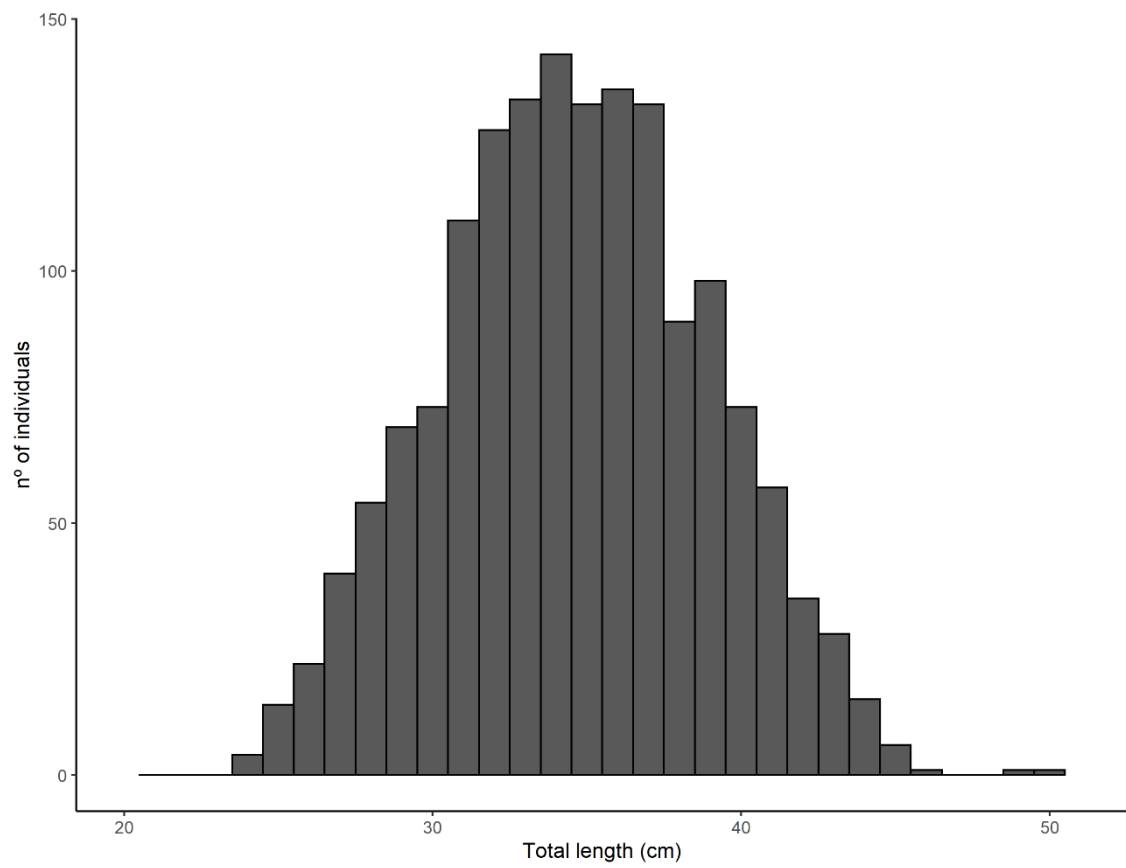

**Supplementary Figure 3.** Length distribution of *Trachurus picturatus* from landings in Peniche port (centre Portugal), during 2018–2019.

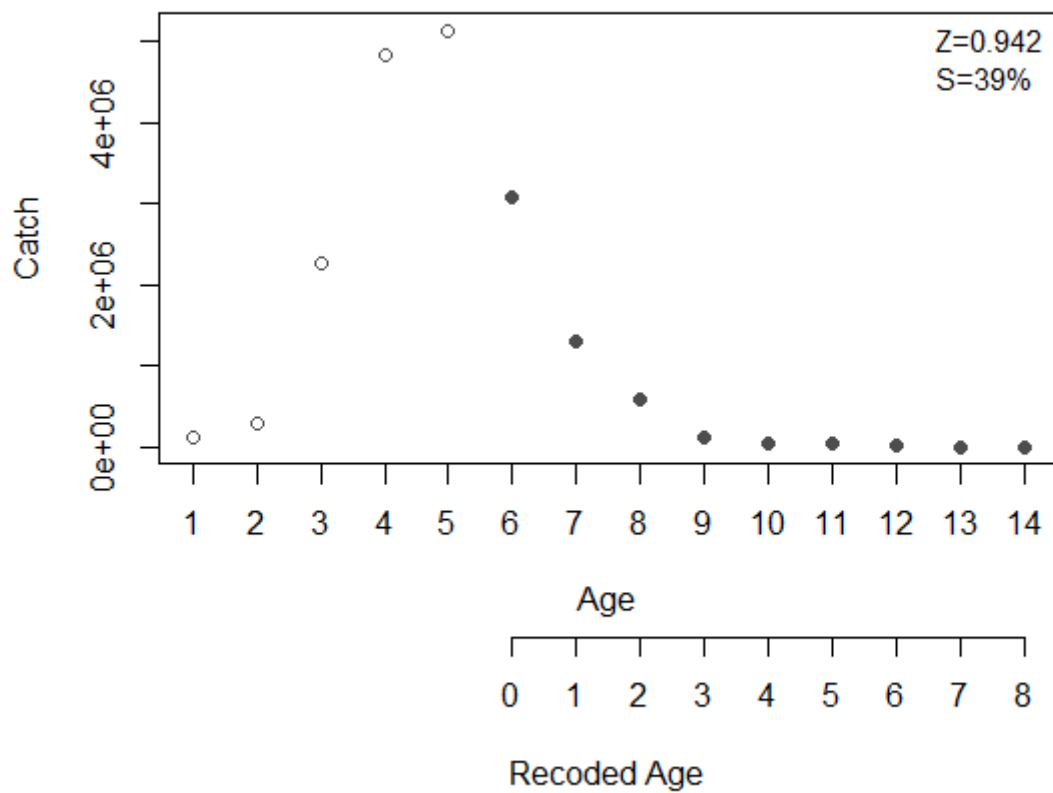

**Supplementary Figure 4.** Chapman-Robson estimates of annual survival rate ( $S$ ) and instantaneous mortality ( $Z$ ) for *Trachurus picturatus* from Portuguese continental coast, described by FSA package for R environment. Grey dots are ages from descending-limb used in estimations.
