# Supplementary material
Source: MDPI journal article supplement (https://www.mdpi.com/2410-3888/7/1/52)
Supplement: s1 [file s1]

**Supplementary Table 1.** Monthly description for age and mortality sampling sets of *Trachurus picturatus* from Portuguese continental coast. n – number of individuals; TLmean - mean total length; n<sub>boats</sub> – number of boats.

|       | Age Sampling |                    | Mortality Sampling |                    |                    |
|-------|--------------|--------------------|--------------------|--------------------|--------------------|
|       | n            | TL <sub>mean</sub> | n                  | TL <sub>mean</sub> | n <sub>boats</sub> |
| Apr18 |              |                    | 101                | 35.8               | 5                  |
| May18 |              |                    | 144                | 37.6               | 11                 |
| Jun18 |              |                    | 132                | 36.0               | 7                  |
| Aug18 |              |                    | 84                 | 39.0               | 6                  |
| Sep18 | 40           | 37.6               | 131                | 34.6               | 6                  |
| Oct18 | 26           | 35.8               | 55                 | 35.9               | 5                  |
| Nov18 | 60           | 30.7               | 64                 | 39.9               | 5                  |
| Dec18 | 18           | 40.9               | 33                 | 34.1               | 1                  |
| Jan19 | 80           | 32.9               | 229                | 32.7               | 9                  |
| Fev19 | 81           | 26.0               | 112                | 32.3               | 6                  |
| Mar19 | 84           | 32.5               | 120                | 35.0               | 5                  |
| Apr19 | 31           | 27.2               | 6                  | 44.1               | 2                  |
| May19 | 61           | 32.3               | 123                | 36.4               | 5                  |
| Jun19 | 49           | 30.1               |                    |                    |                    |
| Jul19 | 23           | 39.1               |                    |                    |                    |
| Aug19 | 35           | 31.6               | 133                | 37.5               | 7                  |

**Supplementary Table 2.** Direct readings age–length key for *Trachurus picturatus* from Portuguese continental coast. n = number of individuals; SD = standard deviation

| Length<br>(cm) | Age (years) |      |      |      |      |      |      |      |      |      |      |      |      |    |      |
|----------------|-------------|------|------|------|------|------|------|------|------|------|------|------|------|----|------|
|                | 1           | 2    | 3    | 4    | 5    | 6    | 7    | 8    | 9    | 10   | 11   | 12   | 13   | 14 | 15   |
| 21             | 1           |      |      |      |      |      |      |      |      |      |      |      |      |    |      |
| 22             | 2           |      |      |      |      |      |      |      |      |      |      |      |      |    |      |
| 23             |             | 2    | 3    | 5    |      |      |      |      |      |      |      |      |      |    |      |
| 24             |             | 5    | 14   | 14   | 1    |      |      |      |      |      |      |      |      |    |      |
| 25             |             | 1    | 14   | 20   | 4    |      |      |      |      |      |      |      |      |    |      |
| 26             |             | 1    | 15   | 30   | 15   | 1    |      |      |      |      |      |      |      |    |      |
| 27             |             |      | 4    | 14   | 22   | 5    |      |      |      |      |      |      |      |    |      |
| 28             |             |      |      | 6    | 27   | 10   |      |      |      |      |      |      |      |    |      |
| 29             |             |      |      | 4    | 8    | 10   | 3    |      |      |      |      |      |      |    |      |
| 30             |             |      |      |      | 1    | 10   | 4    |      |      |      |      |      |      |    |      |
| 31             |             |      |      |      | 1    | 8    | 5    | 3    |      |      |      |      |      |    |      |
| 32             |             |      |      |      | 1    | 9    | 16   | 4    | 2    |      |      |      |      |    |      |
| 33             |             |      |      |      |      | 1    | 13   | 13   | 2    |      |      |      |      |    |      |
| 34             |             |      |      |      |      | 1    | 12   | 26   | 2    |      |      |      |      |    |      |
| 35             |             |      |      |      |      |      | 9    | 17   | 2    |      |      |      |      |    |      |
| 36             |             |      |      |      |      | 1    | 5    | 17   | 5    | 1    |      |      |      |    |      |
| 37             |             |      |      |      |      |      |      | 6    | 12   | 3    |      |      |      |    |      |
| 38             |             |      |      |      |      |      | 1    | 6    | 14   | 6    | 2    |      |      |    |      |
| 39             |             |      |      |      |      |      |      |      | 6    | 10   | 1    |      |      |    |      |
| 40             |             |      |      |      |      |      |      |      |      | 2    | 5    | 2    |      |    |      |
| 41             |             |      |      |      |      |      |      |      |      | 5    | 8    | 3    |      |    |      |
| 42             |             |      |      |      |      |      |      |      |      |      | 6    | 1    | 1    |    |      |
| 43             |             |      |      |      |      |      |      |      |      |      | 6    | 7    | 1    |    |      |
| 44             |             |      |      |      |      |      |      |      |      | 1    | 2    | 2    |      |    |      |
| 45             |             |      |      |      |      |      |      |      |      |      |      | 1    |      |    | 1    |
| 46             |             |      |      |      |      |      |      |      |      |      |      | 1    |      |    |      |
| n              | 3           | 9    | 50   | 93   | 80   | 56   | 68   | 92   | 45   | 29   | 30   | 17   | 2    | 0  | 1    |
| Mean           | 21.9        | 24.4 | 25.5 | 26.2 | 27.8 | 30.2 | 33.5 | 35.2 | 37.2 | 39.5 | 41.6 | 42.9 | 43   |    | 45.9 |
| SD             | 0.79        | 0.79 | 1.04 | 1.38 | 1.40 | 1.91 | 1.89 | 1.68 | 1.82 | 1.81 | 1.52 | 1.70 | 0.14 |    | 0    |

**Supplementary Table 3.** Back-calculated mean total length (cm) of *Trachurus picturatus* from Portuguese continental coast. n = number of individuals; n<sub>a</sub> = number of measures for each annulus; SD = standard deviation.

| Age Class            | n  | Annulus |       |       |       |       |       |       |       |       |       |       |       |       |       |
|----------------------|----|---------|-------|-------|-------|-------|-------|-------|-------|-------|-------|-------|-------|-------|-------|
|                      |    | 1       | 2     | 3     | 4     | 5     | 6     | 7     | 8     | 9     | 10    | 11    | 12    | 13    | 14    |
| <b>1</b>             | 3  | 18.47   |       |       |       |       |       |       |       |       |       |       |       |       |       |
| <b>2</b>             | 13 | 16.32   | 22.50 |       |       |       |       |       |       |       |       |       |       |       |       |
| <b>3</b>             | 36 | 16.19   | 21.05 | 24.95 |       |       |       |       |       |       |       |       |       |       |       |
| <b>4</b>             | 44 | 15.00   | 19.35 | 23.12 | 26.06 |       |       |       |       |       |       |       |       |       |       |
| <b>5</b>             | 24 | 15.99   | 20.35 | 23.54 | 26.11 | 28.15 |       |       |       |       |       |       |       |       |       |
| <b>6</b>             | 33 | 16.25   | 20.65 | 23.96 | 26.53 | 28.42 | 29.98 |       |       |       |       |       |       |       |       |
| <b>7</b>             | 34 | 16.26   | 20.89 | 24.57 | 27.40 | 29.68 | 31.59 | 33.14 |       |       |       |       |       |       |       |
| <b>8</b>             | 53 | 16.68   | 21.28 | 24.83 | 27.73 | 29.90 | 31.78 | 33.45 | 34.67 |       |       |       |       |       |       |
| <b>9</b>             | 53 | 17.44   | 21.94 | 25.48 | 28.48 | 31.00 | 32.76 | 34.26 | 35.54 | 36.59 |       |       |       |       |       |
| <b>10</b>            | 33 | 18.01   | 22.68 | 26.25 | 29.21 | 31.60 | 33.56 | 35.15 | 36.55 | 37.65 | 38.59 |       |       |       |       |
| <b>11</b>            | 28 | 18.33   | 22.86 | 26.55 | 29.52 | 31.98 | 34.13 | 35.91 | 37.41 | 38.64 | 39.86 | 40.84 |       |       |       |
| <b>12</b>            | 14 | 18.00   | 22.42 | 25.96 | 28.77 | 31.30 | 33.50 | 35.39 | 36.92 | 38.22 | 39.52 | 40.63 | 41.56 |       |       |
| <b>13</b>            | 7  | 15.32   | 19.80 | 23.58 | 26.82 | 29.68 | 32.28 | 34.41 | 36.15 | 37.81 | 39.04 | 40.14 | 41.09 | 41.91 |       |
| <b>14</b>            | 1  | 18.36   | 22.87 | 25.84 | 28.49 | 30.74 | 32.26 | 34.01 | 35.68 | 36.95 | 38.17 | 39.69 | 40.88 | 42.01 | 42.90 |
| <b>n<sub>a</sub></b> |    | 367     | 373   | 360   | 324   | 280   | 256   | 223   | 190   | 137   | 84    | 51    | 23    | 9     | 1     |
| <b>Mean</b>          |    | 16.70   | 21.28 | 24.83 | 27.69 | 30.24 | 32.32 | 34.31 | 35.87 | 37.50 | 39.20 | 40.64 | 41.36 | 41.93 | 42.90 |
| <b>SD</b>            |    | 2.16    | 2.34  | 2.50  | 2.64  | 2.60  | 2.55  | 2.35  | 2.34  | 2.23  | 2.24  | 2.06  | 1.62  | 1.77  | 0     |
