# Supplementary material
Source: MDPI journal article supplement (https://www.mdpi.com/2410-3888/7/1/52)
Supplement: s1 [file s1]

Archive with 4 entries (4 files):
- fishes-1568355-Supplementary Figures.pdf
- fishes-1568355-Supplementary Tables.pdf
- fishes-1568355-Supplementary Text 1.pdf
- Supplementary Text 2.html
